# Supplementary material for: Small-sized and large-pore dendritic mesoporous silica nanoparticles enhance antimicrobial enzyme delivery
Source: Royal Society of Chemistry journal article supplement (doi:10.1039/c6tb00053c), 2016-01-01
Supplement: c6tb00053c1.pdf [file c6tb00053c1.pdf]

## Electronic Supporting information

### **Small-sized and large-pore dendritic mesoporous silica nanoparticles enhance antimicrobial enzyme delivery**

Yue Wang,<sup>a</sup> Yusilawati Ahmad Nor,<sup>a</sup> Hao Song,<sup>a</sup> Yannan Yang,<sup>a</sup> Chun Xu,<sup>a</sup> Meihua Yu<sup>a</sup> and Chengzhong Yu<sup>\*,a</sup>

Australian Institute for Bioengineering and Nanotechnology, the University of Queensland,  
Brisbane, QLD 4072, Australian. Fax: +61-7-334 63973; Tel: +61-7-334 63283; E-mail:

[c.yu@uq.edu.au](mailto:c.yu@uq.edu.au)

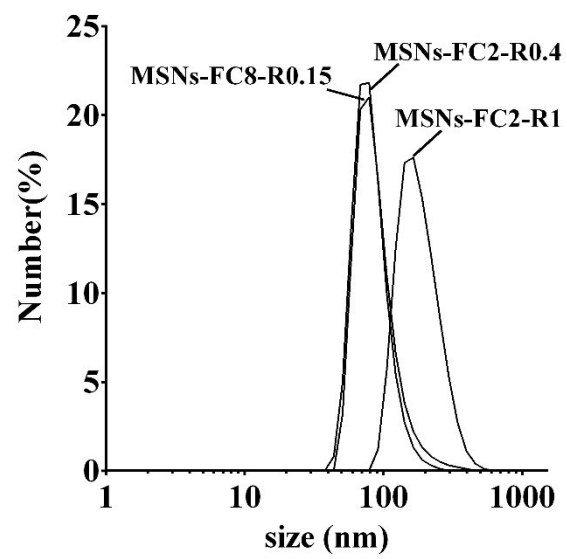

Figure S1 Particle size distribution curves measured by DLS

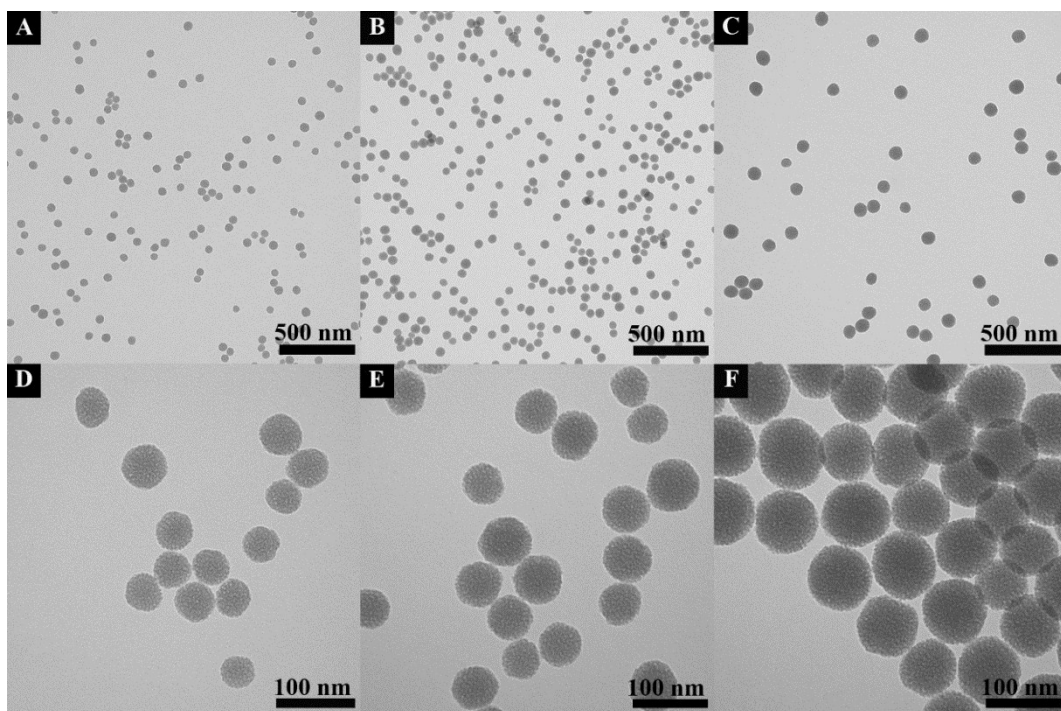

**Figure S2.** TEM images of MSNs-FC2. (A), (D) MSNs-R0; (B), (E) MSNs-FC2-R0.2; (C), (F) MSNs-FC2-R0.4.

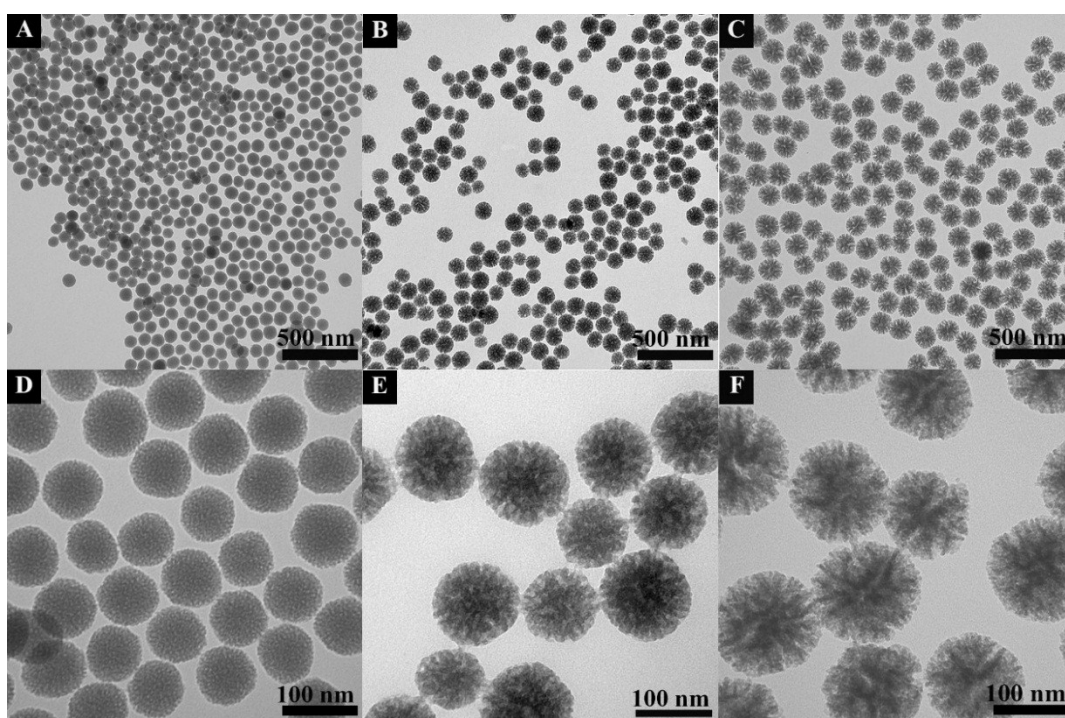

**Figure S3.** TEM images of MSNs-FC2. (A), (D) MSNs-FC2-R0.5; (B), (E) MSNs-FC2-R0.75; (C), (F) MSNs-FC2-R1.

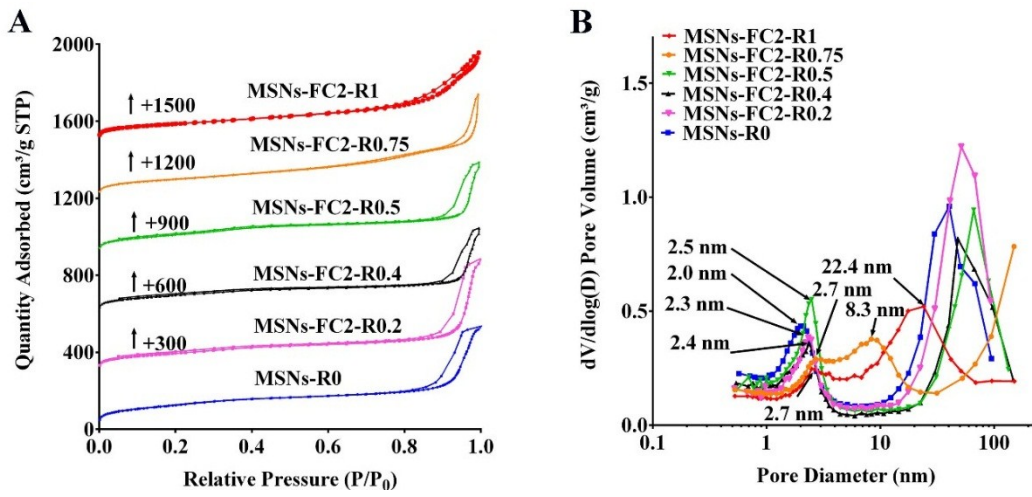

**Figure S4.** N<sub>2</sub> sorption isotherm (A) and pore size distribution (B) of the MSNs-FC2

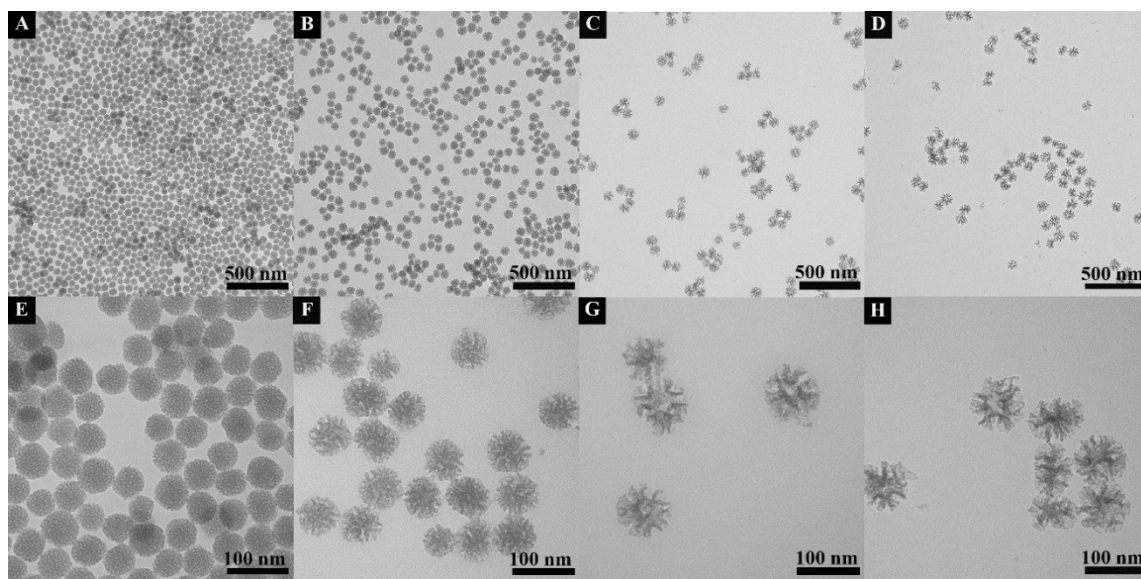

**Figure S5.** TEM images of MSNs-FC8. (A), (E) MSNs-FC8-R0.05; (B), (F) MSNs-FC8-R0.1; (C), (G) MSNs-FC8-R0.15; (D),(H) MSNs-FC8-R0.2

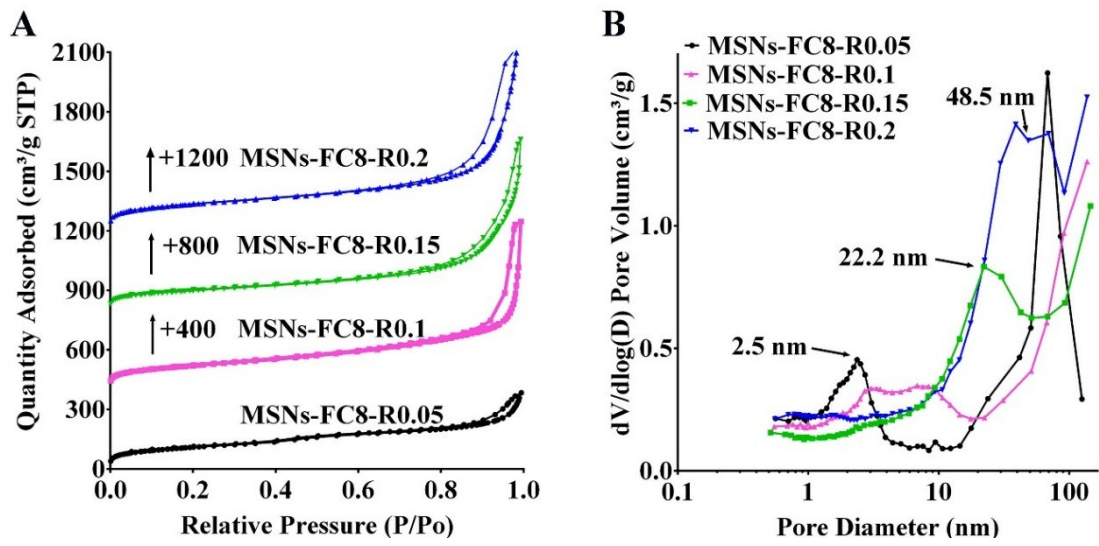

**Figure S6.** N<sub>2</sub> sorption isotherm (A) and pore size distribution (B) of the MSNs-FC8

**Table S1.** Physical properties of MSNs-FC2

| Sample name    | D<br>(nm) | d<br>(nm) | S<br>(m <sup>2</sup> g <sup>-1</sup> ) | V<br>(cm <sup>3</sup> g <sup>-1</sup> ) |
|----------------|-----------|-----------|----------------------------------------|-----------------------------------------|
| MSNs-R0        | 44        | 2.0       | 452                                    | 0.79                                    |
| MSNs-FC2-R0.2  | 62        | 2.3       | 561                                    | 0.64                                    |
| MSNs-FC2-R0.4  | 86        | 2.4       | 344                                    | 0.84                                    |
| MSNs-FC2-R0.5  | 90        | 2.5       | 396                                    | 0.76                                    |
| MSNs-FC2-R0.75 | 108       | 2.7, 8.3  | 350                                    | 0.84                                    |
| MSNs-FC2-R1    | 160       | 2.7, 22.4 | 340                                    | 0.82                                    |

**Table S2.** Physical properties of MSNs-FC8

| Sample name    | D<br>(nm) | d<br>(nm) | S<br>(m <sup>2</sup> g <sup>-1</sup> ) | V<br>(cm <sup>3</sup> g <sup>-1</sup> ) |
|----------------|-----------|-----------|----------------------------------------|-----------------------------------------|
| MSNs-FC8-R0.05 | 57        | 2.5       | 457                                    | 1.05                                    |
| MSNs-FC8-R0.1  | 68        | 3.3-8.4   | 427                                    | 1.32                                    |
| MSNs-FC8-R0.15 | 79        | 22.2      | 349                                    | 1.33                                    |
| MSNs-FC8-R0.2  | 87        | 48.5      | 468                                    | 1.93                                    |

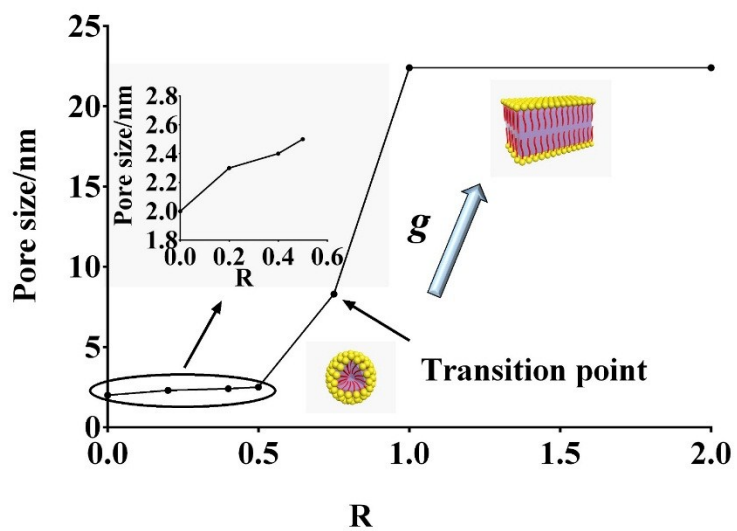

Figure S7. Correlation of pore size and R for MSNs-FC2



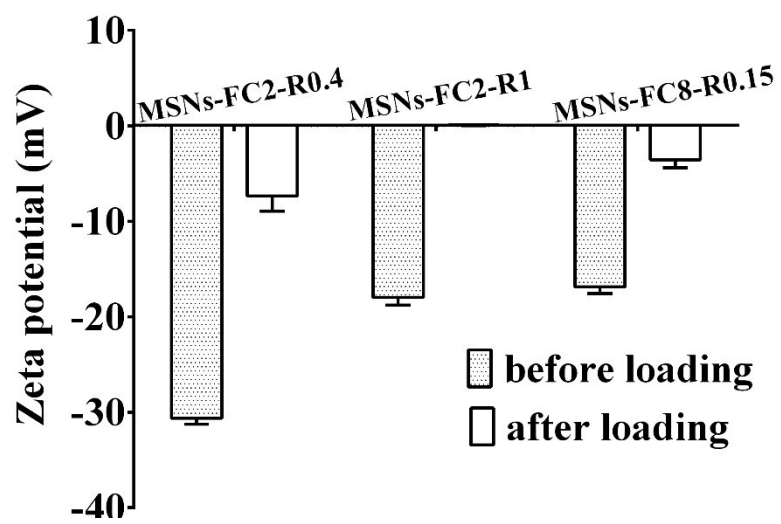

Figure S8. Zeta potential change before and after loading lysozyme in MSNs

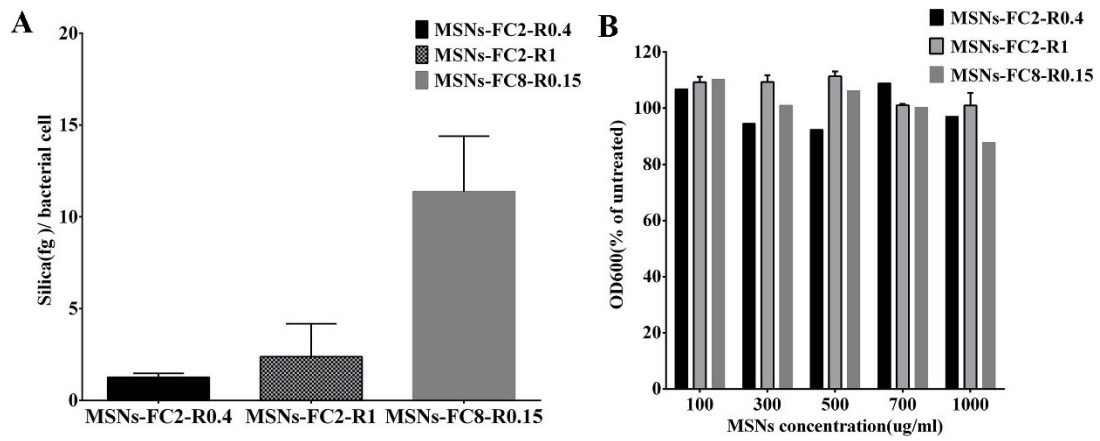

**Figure S9.** (a) Silica content adhered on the bacterial surface from ICP test. (b) Dose dependent toxicity of MSNs towards *E. coli*.
